# Supplementary material for: 262 Voyages Beneath the Sea: a global assessment of macro- and megafaunal biodiversity and research effort at deep-sea hydrothermal vents
Source: PeerJ. 2019 Aug 6;7:e7397. doi: 10.7717/peerj.7397 (PMC6688594; doi:10.7717/peerj.7397)
Supplement: Supplemental Information 2 — Columns 1–3: Phylum, Class, Family. Remaining columns are for each individual cruise report. Each sheet represents a differenet biogeographic province. [file peerj-07-7397-s002.xlsx]

## Sheet: Mid-Cayman Spreading Center
Phylum	Class	Family	JC044	EX1104	JC082	YK13-05	FK008
Cnidaria	Anthozoa	Actinostolidae	0	0	1	0	0
Arthropoda	Malacostraca	Alvinocarididae	1	1	1	1	1
Annelida	Polychaeta	Archinomidae	0	0	1	0	0
Echinodermata	Holothuroidea	Chiridotidae	0	0	0	1	0
Arthropoda	Malacostraca	Gammaridae	1	0	1	0	0
Annelida	Polychaeta	Hesionidae	0	0	1	0	0
Arthropoda	Malacostraca	Hippolytidae	0	1	1	1	1
Mollusca	Gastropoda	Lepetodrilidae	0	0	0	0	0
Arthropoda	Malacostraca	Munidopsidae	0	1	0	1	0
Mollusca	Bivalvia	Mytilidae	0	1	0	0	1
Echinodermata	Ophiuroidea	Ophiuridae	0	1	1	0	0
Annelida	Polychaeta	Polynoidae	0	1	0	0	0
Mollusca	Gastropoda	Provannidae	0	0	1	0	0
Annelida	Polychaeta	Siboglinidae	0	0	1	1	0
Mollusca	Gastropoda	Turbinidae	1	1	1	1	1
Chordata	Actinopterygii	Zoarcidae	0	1	0	0	1

## Sheet: Southern Ocean
Phylum	Class	Family	JC055	AraonXX	JC042	JR224	ELT22
Mollusca	Gastropoda	Buccinidae	0	0	1	0	0
Annelida	Polychaeta	Chaetopteridae	1	0	1	0	0
Porifera	Demospongiae	Cladorhizidae	0	0	1	0	0
Arthropoda	Pycnogonida	Colossendeidae	0	0	1	0	0
Echinodermata	Echinoidea	Echinidae	0	0	1	0	0
Echinodermata	Brisingida	Freyellidae	0	0	1	0	0
Arthropoda	Malacostraca	Galatheidae	0	0	1	0	0
Arthropoda	Malacostraca	Gammaridae	0	0	1	0	0
Arthropoda	Malacostraca	Hippolytidae	0	0	1	0	0
Arthropoda	Malacostraca	Kiwaidae	0	1	1	1	1
Mollusca	Gastropoda	Lepetodrilidae	0	0	1	0	0
Mollusca	Gastropoda	Littorinidae	0	0	1	0	0
Arthropoda	Malacostraca	Lysianassidae	0	0	1	0	0
Arthropoda	Malacostraca	Nematocarcinidae	0	0	1	1	0
Annelida	Polychaeta	Nereididae	0	0	1	0	0
Echinodermata	Asteroidea	Odontasteridae	0	0	1	0	0
Echinodermata	Asteroidea	Paulasteriidae	0	1	0	0	0
Echinodermata	Holothuroidea	Pelagothuriidae	0	0	1	0	0
Annelida	Polychaeta	Polynoidae	0	0	1	0	0
Mollusca	Gastropoda	Pyropeltidae	0	0	1	0	0
Annelida	Polychaeta	Siboglinidae	1	0	0	0	0
Mollusca	Gastropoda	Skeneidae	0	0	1	0	0
Chordata	Actinopterygii	Zoarcidae	0	0	1	0	0

## Sheet: Indian Ocean
Phylum	Class	Family	KR00-05	YK09-13 L1	YK09-13 L2	YK13-02	YK16-E02	JC066	JC067
Cnidaria	Anthozoa	Actinostolidae	1	0	0	0	0	0	0
Arthropoda	Malacostraca	Alvinocarididae	1	1	1	1	1	0	1
Arthropoda	Pycnogonida	Ammotheidae	0	0	0	0	0	1	0
Annelida	Polychaeta	Ampharetidae	0	0	0	0	1	0	1
Annelida	Polychaeta	Amphinomidae	0	0	1	0	1	0	0
Arthropoda	Malacostraca	Bythograeidae	1	0	1	1	1	0	0
Mollusca	Gastropoda	Cancellariidae	1	0	0	0	1	0	0
Annelida	Polychaeta	Capitellidae	0	0	0	0	0	0	1
Echinodermata	Holothuroidea	Chiridotidae	0	0	0	0	0	0	1
Echinodermata	Holothuroidea	Deimatidae	0	0	0	0	1	0	0
Echinodermata	Holothuroidea	Elpdiidae	0	0	0	0	1	0	0
Nemertea	Enopla	Emplectonematidae	0	0	0	0	1	0	0
Arthropoda	Hexanauplia	Eolepadidae	1	0	0	0	1	0	1
Annelida	Polychaeta	Hesionidae	1	0	0	0	0	0	0
Cnidaria	Anthozoa	Kadosctinidae	0	0	0	0	1	0	0
Arthropoda	Malacostraca	Kiwaidae	0	0	0	0	0	0	1
Mollusca	Gastropoda	Lepetodrilidae	1	0	0	0	1	0	1
Arthropoda	Malacostraca	Mirocarididae	0	0	1	0	1	0	1
Arthropoda	Malacostraca	Munidopsidae	0	0	0	1	1	0	0
Mollusca	Bivalvia	Mytilidae	1	0	1	1	1	1	1
Mollusca	Gastropoda	Neolepetopsidae	1	0	0	0	0	0	0
Annelida	Polychaeta	Nephtyidae	0	0	0	0	0	0	1
Mollusca	Cephalopoda	Opisthoteuthidae	0	0	0	0	1	0	0
Mollusca	Gastropoda	Peltospiridae	0	1	1	1	1	1	1
Mollusca	Gastropoda	Phenacolepadidae	0	1	0	0	1	0	0
Annelida	Polychaeta	Polynoidae	1	0	1	0	1	0	1
Mollusca	Gastropoda	Provannidae	1	1	1	1	1	0	0
Echinodermata	Holothuroidea	Psychropotidae	0	0	0	0	1	0	0
Mollusca	Gastropoda	Raphitomidae	1	1	1	1	1	0	1
Chordata	Actinopterygii	Rondeletiidae	0	0	0	0	1	0	0
Arthropoda	Hexanauplia	Scalpellidae	1	0	0	0	0	0	0
Mollusca	Gastropoda	Skeneidae	1	0	0	0	1	0	0
Chordata	Actinopterygii	Zoarcidae	1	0	0	0	1	0	0

## Sheet: Mid-Atlantic Ridge
Phylum	Class	Family	BIOBAZ 2013	BIOCOSE	EXOMAR	MOMARSAT2013	GEOMAR1	MOMARETO	GEOMAR2	M60/3	VENTuRE	SERPENTINE	ATOS	A127-01	CD76	DIVANAUT 1	DIVANAUT 2	D228	MARVEL	PICO	SALDHANA	AT5-03	SEAHMA 1	BIOBAZ 2011	KNOX18RR	MOMARSAT2010	CD169	M64/1	M64/2
Arthropoda	Malacostraca	Alvinocarididae	1	1	1	0	0	1	1	1	1	1	1	0	0	0	1	1	1	1	1	1	1	0	1	0	1	1	1
Arthropoda	Pycnogonida	Ammotheidae	0	0	0	0	0	0	0	0	0	0	0	0	0	1	0	0	0	1	0	0	0	0	0	0	0	0	0
Annelida	Polychaeta	Ampharetidae	0	1	1	0	0	1	0	0	0	1	1	0	0	1	0	0	1	0	0	0	0	0	0	0	0	1	0
Annelida	Polychaeta	Amphinomidae	0	1	0	0	0	1	0	0	1	1	1	0	0	0	0	0	0	1	0	0	0	0	0	0	0	1	1
Chordata	Actinopterygii	Bythitidae	0	0	0	0	0	0	0	0	0	0	0	0	0	0	0	0	1	0	0	0	0	0	0	0	0	0	1
Arthropoda	Malacostraca	Bythograeidae	0	0	1	0	0	1	1	0	0	1	1	0	0	1	0	0	1	1	0	1	0	0	0	1	0	1	1
Cnidaria	Hydrozoa	Candelabridae	0	1	0	0	0	0	0	0	0	0	0	0	0	0	0	0	0	0	0	0	0	0	0	0	0	0	0
Annelida	Polychaeta	Capitellidae	0	1	0	0	0	0	0	0	0	1	0	0	0	0	0	0	0	0	0	0	0	0	0	0	0	0	0
Annelida	Polychaeta	Chaetopteridae	0	1	1	0	0	0	0	0	0	1	0	0	0	0	0	0	0	0	0	0	0	0	0	0	0	1	1
Porifera	Demospongia	Cladorhizidea	0	0	0	0	0	0	0	0	0	0	0	0	0	0	1	0	1	0	0	0	0	0	0	0	0	0	0
Arthropoda	Maxillopoda	Cyclopinidae	0	0	0	0	0	1	0	0	0	0	0	0	0	0	0	0	0	0	0	0	0	0	0	0	0	0	0
Arthropoda	Hexanauplia	Diosaccidae	0	0	0	0	0	1	0	0	0	1	0	0	0	0	0	0	0	0	0	0	0	0	0	0	0	0	0
Arthropoda	Hexanauplia	Dirivultidae	0	0	0	0	0	1	0	0	0	1	0	0	0	0	0	0	0	0	0	0	0	0	0	0	0	0	0
Annelida	Polychaeta	Dorvilleidae	0	0	0	0	0	1	0	0	0	0	0	0	0	0	1	0	0	1	0	0	0	0	0	0	0	0	0
Mollusca	Gastropoda	Elachisinidae	0	0	0	0	0	0	0	0	0	0	1	0	0	0	0	0	0	0	0	0	0	0	0	0	0	0	0
Arthropoda	Hexanauplia	Erebonasteridae	0	0	0	0	0	0	0	0	0	1	0	0	0	0	0	0	0	1	0	0	0	0	0	0	0	0	0
Cnidaria	Hydrozoa	Eudendriidae	0	0	0	0	0	0	0	0	0	0	0	0	0	0	1	0	0	0	0	0	0	0	0	0	0	0	0
Annelida	Polychaeta	Eunicidae	0	0	0	0	0	0	0	0	0	0	0	0	0	0	1	0	0	1	0	0	0	0	0	0	0	0	0
Arthropoda	Malacostraca	Galatheidae	0	0	0	0	0	0	0	0	0	0	0	0	0	0	0	0	0	0	1	0	0	0	0	0	0	0	0
Arthropoda	Malacostraca	Geryonidae	0	0	1	0	0	0	0	0	0	0	0	0	0	0	0	0	1	0	0	0	0	0	0	0	0	0	0
Annelida	Polychaeta	Glyceridae	0	0	0	0	0	0	0	0	0	0	0	0	0	1	1	0	0	1	0	0	0	0	0	0	0	0	0
Annelida	Polychaeta	Hesionidae	0	1	0	0	0	0	0	0	0	1	1	0	0	0	0	0	0	0	0	0	0	0	0	0	0	0	0
Porifera	Hexactinellida	Hyalonematidae	0	1	0	0	0	0	0	0	0	0	0	0	0	0	0	0	0	0	0	0	0	0	0	0	0	0	0
Mollusca	Gastropoda	Lepetodrilidae	0	1	0	0	0	1	0	0	0	1	1	0	0	0	1	0	1	1	0	0	0	0	0	0	0	0	0
Arthropoda	Malacostraca	Lysianassidae	0	0	0	0	0	0	0	0	0	0	1	0	0	0	0	0	0	0	0	0	0	0	0	0	0	0	0
Annelida	Polychaeta	Malanidae	0	1	0	0	0	0	0	0	0	0	0	0	0	0	0	0	0	0	0	0	0	0	0	0	0	1	0
Arthropoda	Malacostraca	Mirocarididae	1	1	1	1	0	1	1	0	0	1	1	0	0	1	1	0	1	1	1	1	0	0	0	1	0	1	1
Chordata	Actinopterygii	Moridae	0	0	0	0	0	0	0	0	0	0	0	0	0	0	0	0	1	0	0	0	0	0	0	0	0	0	0
Arthropoda	Malacostraca	Munidopsidae	0	1	1	0	0	0	0	0	0	1	0	0	1	0	0	0	0	0	0	0	0	0	0	0	0	0	1
Mollusca	Bivalvia	Mytilidae	1	0	1	1	1	1	1	1	0	1	1	1	0	1	1	1	1	1	1	0	1	1	1	1	0	1	1
Mollusca	Gastropoda	Neolepetopsidae	0	0	0	0	0	0	0	0	0	0	0	0	0	1	0	0	0	0	0	0	0	0	0	0	0	0	0
Arthropoda	Hexanauplia	Oncaeidae	0	0	0	0	0	1	0	0	0	0	0	0	0	0	0	0	0	0	0	0	0	0	0	0	0	0	0
Echinodermata	Ophiuroidea	Ophiacanthidae	0	0	0	0	0	0	0	0	0	0	0	0	0	1	0	0	1	0	0	0	0	0	0	0	0	0	0
Echinodermata	Ophiuroidea	Ophiuridae	0	1	0	0	0	0	0	0	0	0	1	0	0	0	0	0	1	1	0	0	0	0	0	0	0	0	1
Mollusca	Gastropoda	Orbitestellidae	0	0	0	0	0	0	0	0	0	0	1	0	0	0	0	0	0	0	0	0	0	0	0	0	0	0	0
Mollusca	Bivalvia	Pectinidae	0	0	0	0	0	0	0	0	0	1	0	0	0	0	0	0	0	0	0	0	0	0	0	0	0	0	0
Mollusca	Gastropoda	Peltospiridae	0	1	0	0	0	0	0	0	1	1	0	0	0	0	0	0	0	0	0	1	0	0	0	0	0	0	1
Mollusca	Gastropoda	Phenacolepadidae	0	1	1	0	0	1	0	0	0	1	1	0	0	1	1	0	1	1	0	1	0	0	0	0	0	0	0
Annelida	Polychaeta	Polynoidea	0	1	1	0	0	1	0	0	1	1	1	0	0	1	1	0	1	1	0	1	0	0	0	1	0	1	0
Mollusca	Gastropoda	Raphitomidae	0	0	0	0	0	0	0	0	0	1	1	0	0	0	0	0	0	1	0	1	0	0	0	0	0	1	1
Annelida	Polychaeta	Sabellidae	0	1	0	0	0	0	0	0	0	0	0	0	0	0	0	0	0	0	0	0	0	0	0	0	0	0	0
Annelida	Polychaeta	Serpulidae	0	0	0	0	0	0	0	0	0	0	1	0	0	0	0	0	0	0	0	0	0	0	0	0	0	0	0
Mollusca	Gastropoda	Skeneidae	0	1	0	0	0	1	0	0	1	1	1	0	0	1	0	0	1	1	0	0	0	0	0	1	0	0	0
Arthropoda	Hexanauplia	Spinocalanidae	0	0	0	0	0	1	0	0	0	0	0	0	0	0	0	0	0	0	0	0	0	0	0	0	0	0	0
Annelida	Polychaeta	Spionidae	0	1	0	0	0	0	0	0	1	1	1	0	0	0	1	0	1	1	0	0	0	0	0	0	0	1	0
Mollusca	Gastropoda	Sutilizonidae	0	1	0	0	0	0	0	0	0	0	0	0	0	0	0	0	0	0	0	0	0	0	0	0	0	0	0
Porifera	Calcarea	Sycettidae	0	0	0	0	0	0	0	0	0	0	1	0	0	0	0	0	0	0	0	0	0	0	0	0	0	0	0
Arthropoda	Maxillopoda	Tegastidae	0	0	0	0	0	1	0	0	0	0	0	0	0	0	0	0	0	0	0	0	0	0	0	0	0	0	0
Arthropoda	Hexanauplia	Tisbidae	0	0	0	0	0	1	0	0	0	0	0	0	0	0	0	0	0	1	0	0	0	0	0	0	0	0	0
Cnidaria	Anthozoa	Turbinoliidae	0	0	0	0	0	0	0	0	0	0	0	0	0	0	1	0	0	0	0	0	0	0	0	0	0	0	0
Mollusca	Gastropoda	Turridae	0	0	0	0	0	0	0	0	1	0	0	0	0	0	0	0	0	0	0	0	0	0	0	0	0	0	0
Mollusca	Bivalvia	Vesicomyidae	0	0	0	0	0	0	1	1	0	1	0	0	0	0	0	0	0	0	0	0	0	0	0	0	0	1	0
Chordata	Actinopterygii	Zoarcidae	0	1	0	0	0	0	0	0	1	1	1	0	0	0	0	0	0	0	1	0	0	0	0	0	0	0	0

## Sheet: Juan de Fuca Ridge
Phylum	Class	Family	AT15-09	VENTS LEG II	NeMO 1998	TN094	RB-00-05 Leg II	RB-01-06	TN149 Leg 2a	TN160	TN173	TN199	AT15-21	AT15-47	AT18-08	BioROPOS 94
Annelida	Polychaeta	Alvinellidae	1	0	1	1	1	1	1	1	0	0	1	0	1	1
Arthropoda	Pycnogonida	Ammotheidae	0	0	0	0	0	0	0	0	0	0	0	0	0	1
Mollusca	Gastropoda	Buccinidae	0	0	0	0	0	0	0	0	0	0	0	0	0	1
Ciliophora	Heterotrichida	Folliculinidae	0	0	0	0	0	0	0	0	1	1	0	0	0	0
Arthropoda	Malacostraca	Galatheidae	0	0	0	0	0	0	0	0	0	0	0	0	0	1
Annelida	Polychaeta	Hesionidae	0	0	0	0	0	0	0	0	0	0	0	0	0	1
Mollusca	Gastropoda	Lepetodrilidae	0	0	0	0	0	1	1	1	0	1	1	0	0	1
Annelida	Polychaeta	Maldanidae	0	0	0	0	0	0	0	0	0	0	0	0	0	1
Arthropoda	Hexanauplia	Nucellicolidae	0	0	0	0	0	0	0	0	0	1	0	0	0	0
Mollusca	Gastropoda	Peltospiridae	0	0	0	0	0	1	1	0	0	0	0	0	0	1
Annelida	Polychaeta	Polynoidea	0	0	1	1	1	1	0	0	0	0	1	0	0	1
Mollusca	Gastropoda	Provannidae	0	0	0	0	1	0	1	0	0	0	0	0	0	1
Annelida	Polychaeta	Siboglinidae	1	1	1	1	1	1	1	1	1	1	1	1	0	1
Mollusca	Gastropoda	Sutilizonidae	0	0	0	0	1	0	0	0	0	0	0	0	0	0
Mollusca	Gastropoda	Thiaridae	0	0	0	0	0	0	0	0	0	0	0	0	0	1
Mollusca	Bivalvia	Vesicomyidae	0	1	1	1	0	1	0	0	0	1	0	0	0	0

## Sheet: Northern East Pacific Rise
Phylum	Class	Family	AT3-51	HOT-96	AT15-15	PHARE	BIG	TCS06NH	AT3-33	HOPE 99
Annelida	Polychaeta	Alvinellidae	1	1	0	1	0	0	1	1
Annelida	Polychaeta	Ampharetidae	1	1	0	1	1	0	0	0
Annelida	Polychaeta	Amphinomidae	1	1	0	0	1	0	0	0
Arthropoda	Malacostraca	Bythograeidae	1	1	0	1	0	0	1	1
Arthropoda	Hexanauplia	Dirivultidae	0	0	0	1	0	0	0	0
Annelida	Polychaeta	Dorvilleidae	1	0	0	0	0	0	0	0
Mollusca	Cephalopoda	Entreoctopodidae	0	0	0	0	0	0	0	1
Annelida	Polychaeta	Hesionidae	1	1	0	1	0	0	0	1
Mollusca	Gastropoda	Lepetodrilidae	1	1	0	1	0	0	0	1
Chordata	Actinopterygii	Liparidae	0	1	0	0	0	0	0	0
Annelida	Polychaeta	Maldanidae	0	1	0	0	0	0	0	0
Mollusca	Gastropoda	Melanodrymiidae	1	0	0	0	0	0	0	0
Arthropoda	Malacostraca	Munidopsidae	0	1	0	0	0	1	0	1
Mollusca	Bivalvia	Mytilidae	1	1	1	0	0	0	1	1
Arthropoda	Malacostraca	Nebaliidae	1	1	0	0	0	0	0	0
Arthropoda	Malacostraca	Nematocarcinidae	0	1	0	0	0	0	0	1
Mollusca	Gastropoda	Neolepetopsidae	1	0	0	0	0	0	0	1
Mollusca	Gastropoda	Neomphalidae	1	1	0	0	0	0	0	1
Annelida	Polychaeta	Nereididae	1	1	0	1	1	0	1	0
Arthropoda	Malacostraca	Pardaliscidae	1	0	0	0	0	0	0	0
Mollusca	Gastropoda	Peltospiridae	1	0	0	1	0	0	0	1
Annelida	Polychaeta	Phyllodocidae	0	1	0	0	0	0	0	0
Annelida	Polychaeta	Polynoidea	1	1	0	1	1	0	0	1
Mollusca	Bivalvia	Propeamussiidae	1	1	0	0	0	0	0	1
Mollusca	Gastropoda	Provannidae	1	0	0	0	1	0	0	1
Mollusca	Gastropoda	Raphitomidae	1	1	0	0	0	0	0	0
Mollusca	Gastropoda	Seguenziidae	1	0	0	0	0	0	0	0
Annelida	Polychaeta	Serpulidae	1	1	0	1	0	0	1	1
Annelida	Polychaeta	Siboglinidae	1	1	1	1	1	1	1	1
Annelida	Polychaeta	Sphaerodoridae	0	0	0	0	1	0	0	0
Chordata	Actinopterygii	Synaphobranchidae	0	0	0	0	0	0	0	1
Arthropoda	Malacostraca	Thoridae	1	1	0	0	0	0	0	1
Mollusca	Bivalvia	Thyasiridae	0	0	0	0	1	0	0	0
Arthropoda	Malacostraca	Uristidae	1	0	0	0	0	0	0	1
Mollusca	Bivalvia	Vesicomyidae	1	1	0	0	1	0	1	1
Chordata	Actinopterygii	Zoarcidae	0	1	0	0	0	1	1	1

## Sheet: Northwest Pacific
Phylum	Class	Family	NT06-21	NT07-11	NT07-13	TN167	MGLN02MV	NT08-07	NT08-13	NT09-05 Leg2	TN232	RR1413	FK161129	NT09-11	NT09-17 Leg2	NT98-08	NT10-06 Leg1	NT10-13 Leg2	NT10-17	KY11-02 Leg3	YK10-13 Leg1	NT11-10 Leg1	KY11-02 Leg2	YK10-10	YK10-11	NT11-09	NT11-19	YK11-06	NT11-20	NT12-10	NT13-09	NT13-05	KY14-01	KY14-02	NT13-22	NT14-06	NT14-21	KY15-07	NT15-13	NT15-05	KM16-07	YK16-11 Leg2
Chordata	Actinopterygii	Cynoglossidae	0	0	0	0	0	0	0	1	0	0	1	0	0	0	0	1	0	0	0	0	0	0	0	0	0	0	0	0	0	0	0	0	0	0	0	0	0	0	0	0
Arthropoda	Malacostraca	Acanthephyridae	0	0	0	0	0	0	0	1	0	0	0	0	0	0	0	0	0	0	0	0	0	0	0	0	0	0	0	0	0	0	0	0	0	0	0	0	0	0	0	0
Mollusca	Gastropoda	Acmaeidae	0	0	0	0	0	0	0	0	0	0	0	0	0	0	0	0	0	0	0	0	0	0	0	0	0	0	0	0	0	0	0	0	0	0	0	0	1	0	0	0
Annelida	Polychaeta	Alvinellidae	0	0	1	0	0	1	1	1	0	0	1	0	0	0	1	0	1	0	0	1	0	0	1	1	0	0	1	1	1	1	1	1	1	1	0	1	1	0	1	0
Arthropoda	Malacostraca	Alvinocarididae	0	1	1	1	0	1	1	1	1	1	1	1	0	0	0	1	1	1	0	1	1	1	1	1	1	0	1	1	0	1	1	1	1	1	1	0	1	0	1	0
Annelida	Polychaeta	Ampharetidae	0	0	0	1	0	0	0	0	1	0	0	0	0	0	0	0	1	0	0	0	0	0	1	0	0	0	0	0	1	0	1	0	0	1	0	0	0	0	1	0
Annelida	Polychaeta	Amphinomidae	0	0	0	0	0	1	0	1	0	0	0	0	0	0	0	0	0	0	0	0	1	0	0	1	0	0	0	0	0	0	0	0	0	1	0	0	0	0	0	0
Mollusca	Gastropoda	Anatomidae	0	0	0	0	0	0	0	0	0	0	0	0	0	0	0	0	0	0	0	0	0	0	0	0	0	0	0	0	0	1	0	0	0	0	0	0	0	0	0	0
Chordata	Leptocardii	Branchiostomatidae	0	0	0	0	0	0	0	0	0	0	0	0	0	0	0	0	0	0	0	0	0	0	0	0	0	0	0	0	0	1	0	0	0	0	0	0	0	0	0	0
Mollusca	Gastropoda	Buccinidae	0	0	0	0	0	0	0	0	0	0	0	0	0	0	0	0	0	0	0	0	0	0	0	1	0	0	0	0	0	1	1	0	0	0	0	0	1	0	0	0
Mollusca	Gastropoda	Bullidae	0	0	0	0	0	0	0	0	0	0	0	0	0	0	0	0	0	0	0	0	0	0	0	0	0	0	0	0	0	1	0	0	0	0	0	0	0	0	0	0
Arthropoda	Malacostraca	Bythograeidae	0	1	0	1	1	1	0	1	1	1	1	0	0	0	0	1	0	0	0	1	0	1	1	1	0	0	0	1	1	1	1	0	0	1	0	1	0	0	0	0
Mollusca	Gastropoda	Cancellariidae	0	0	0	0	0	0	0	0	0	0	0	0	0	0	0	0	0	0	0	0	0	0	0	0	0	0	0	0	0	0	1	0	0	0	0	0	0	0	0	0
Annelida	Polychaeta	Chrysopetalidae	0	0	0	0	0	0	0	0	0	0	0	0	0	0	0	0	0	0	0	0	0	0	1	0	0	0	0	0	0	0	0	0	0	0	0	0	0	0	0	0
Annelida	Polychaeta	Cirratulidae	0	0	0	1	0	0	0	0	1	0	0	0	0	0	0	0	0	0	0	0	0	0	0	0	0	0	0	0	0	0	0	0	0	0	0	0	0	0	0	0
Mollusca	Gastropoda	Colloniidae	0	1	0	0	0	0	0	0	0	0	0	0	0	0	0	0	0	0	0	0	0	0	0	0	0	0	0	0	0	0	1	0	1	0	0	0	1	0	0	0
Mollusca	Gastropoda	Columbellidae	0	0	0	0	0	0	0	0	0	0	0	0	0	0	0	0	0	0	0	0	0	0	0	0	0	0	0	0	0	0	1	0	0	0	0	0	0	0	0	0
Arthropoda	Malacostraca	Crangonidae	0	0	0	0	0	0	0	0	0	0	0	0	0	0	0	0	0	0	0	0	0	0	0	0	0	0	0	0	0	0	0	0	0	0	0	0	1	0	0	0
Mollusca	Bivalvia	Cuspidariidae	0	0	0	0	0	0	0	0	0	0	0	0	0	0	0	0	0	0	0	0	0	0	0	0	0	0	0	0	0	1	0	0	0	0	0	0	0	0	0	0
Cnidaria	Anthozoa	Dendrophylliidae	0	0	0	0	0	0	0	0	0	0	0	0	0	0	0	1	0	0	0	0	0	0	0	0	0	0	0	0	0	0	0	0	0	0	0	0	0	0	0	0
Arthropoda	Hexanauplia	Dirivultidae	0	0	0	0	0	0	0	0	0	0	0	0	0	0	0	0	0	0	0	0	0	0	0	0	0	0	0	0	0	0	0	0	0	1	0	0	0	0	1	0
Annelida	Polychaeta	Dorvilleidae	0	0	0	1	0	0	0	0	1	0	0	0	0	0	0	0	0	0	0	0	0	0	0	0	0	0	0	0	0	0	0	0	0	0	0	0	0	0	0	0
Mollusca	Gastropoda	Emarginulinae	0	0	0	0	0	0	0	0	0	0	0	0	0	0	0	0	0	0	0	0	0	0	0	0	0	0	0	0	0	0	1	0	0	0	0	0	0	0	0	0
Mollusca	Cephalopoda	Enteroctopodidae	0	0	0	0	0	0	0	0	0	0	0	0	0	0	0	0	0	0	0	0	0	0	0	1	0	0	0	0	0	0	0	0	0	0	0	0	0	0	0	0
Arthropoda	Hexanauplia	Eolepadidae	0	0	0	0	0	0	0	0	0	0	0	0	0	0	0	0	1	0	0	1	0	0	0	1	0	0	0	0	1	0	1	1	0	1	0	0	1	0	1	0
Mollusca	Solenogastres	Epimeniidae	0	0	0	0	0	0	0	0	0	0	0	0	0	0	0	0	0	0	0	0	1	0	0	0	0	0	0	0	0	0	0	0	0	0	0	0	0	0	0	0
Arthropoda	Malacostraca	Eumunididae	0	0	0	0	0	0	0	0	0	0	0	0	0	0	0	1	0	0	0	0	0	0	0	0	0	0	0	0	0	0	0	0	0	0	0	0	0	0	0	0
Annelida	Polychaeta	Eunicidae	0	0	0	0	0	0	0	0	0	0	0	0	0	0	0	0	0	0	0	0	0	0	0	0	0	0	1	0	0	0	0	0	0	0	0	0	0	0	0	0
Porifera	Hexactinellida	Euplectellidae	0	0	0	0	0	1	0	0	0	0	0	0	0	0	0	0	0	0	0	0	0	0	0	0	0	0	0	0	0	0	0	0	0	0	0	0	0	0	0	0
Porifera	Hexactinellida	Farreidae	0	0	0	0	0	0	0	0	0	0	0	0	0	0	0	0	0	0	0	0	0	0	0	0	0	0	0	0	0	1	0	0	0	0	0	0	0	0	0	0
Mollusca	Gastropoda	Fissurellidae	0	0	0	0	0	0	0	0	0	0	0	0	0	0	0	0	0	0	0	0	0	0	0	0	0	0	0	0	0	0	0	0	0	0	0	0	1	0	0	0
Mollusca	Scaphopoda	Gadilidae	0	0	0	0	0	0	0	0	0	0	0	0	0	0	0	0	0	0	0	0	0	0	0	0	0	0	0	0	0	1	0	0	0	0	0	0	0	0	0	0
Arthropoda	Malacostraca	Galatheidae	0	0	0	0	0	1	0	1	0	1	1	1	0	0	0	1	0	0	0	0	0	0	0	0	0	0	0	0	0	0	0	0	0	0	0	0	0	0	1	0
Arthropoda	Malacostraca	Gammaridae	0	0	0	0	0	0	0	0	0	0	0	0	0	0	0	0	0	0	0	0	0	0	0	0	0	0	0	0	0	1	0	0	0	0	0	0	0	0	0	0
Arthropoda	Malacostraca	Glyphocrangonidae	0	0	0	0	0	0	0	0	0	0	0	0	0	0	0	0	0	0	0	0	0	0	0	0	0	0	0	0	0	1	0	0	0	0	0	0	0	0	0	0
Arthropoda	Malacostraca	Gnathiidae	0	0	0	0	0	0	0	0	0	0	0	0	0	0	0	0	0	0	0	0	0	0	0	0	0	0	1	0	0	0	0	0	0	0	0	0	0	0	0	0
Arthropoda	Hexanauplia	Harpacticidae	0	0	0	0	0	0	0	0	0	0	0	0	0	0	0	0	0	0	0	0	1	0	0	0	0	0	0	0	0	0	0	0	0	0	0	0	0	0	0	0
Annelida	Polychaeta	Hesionidae	0	0	0	1	0	0	0	0	1	0	0	0	0	0	0	0	1	0	0	0	0	0	1	0	0	0	0	0	0	0	0	0	0	0	0	0	0	0	0	0
Arthropoda	Malacostraca	Inachidae	0	0	0	0	0	0	0	0	0	0	0	0	0	0	0	1	0	0	0	0	0	0	0	0	0	0	0	0	0	0	0	0	0	0	0	0	0	0	0	0
Mollusca	Polyplacophora	Ischnochitonidae	0	0	0	0	0	0	0	0	0	0	0	0	0	0	0	0	0	0	0	0	0	0	0	0	0	0	0	0	0	1	1	1	1	0	0	0	1	0	0	0
Mollusca	Gastropoda	Lepetodrilidae	0	1	0	1	0	0	1	0	0	0	0	0	0	1	0	0	1	0	0	0	1	0	0	0	0	0	1	0	0	0	1	1	1	0	1	0	1	0	0	0
Arthropoda	Malacostraca	Leucosiidae	0	0	0	0	0	0	0	0	0	0	0	0	0	0	0	1	0	0	0	0	0	0	0	0	0	0	0	0	0	0	0	0	0	0	0	0	0	0	0	0
Mollusca	Bivalvia	Limopsidae	0	0	0	0	0	0	0	0	0	0	0	0	0	0	0	0	0	0	0	0	0	0	0	0	0	0	0	0	0	1	0	0	0	0	0	0	0	0	0	0
Arthropoda	Malacostraca	Lithodidae	0	1	0	0	0	0	0	0	0	0	0	0	0	0	0	0	1	0	0	0	0	0	0	0	0	0	0	0	0	1	0	0	1	0	0	0	0	0	0	0
Mollusca	Bivalvia	Lucinidae	0	1	0	0	0	0	0	0	0	0	0	0	0	0	0	0	0	0	0	0	0	0	0	0	0	0	0	0	0	0	0	0	0	0	0	0	0	0	0	0
Annelida	Polychaeta	Maldanidae	0	0	0	1	0	1	0	0	1	0	0	0	0	0	0	0	1	0	0	0	1	0	0	0	0	0	1	0	0	0	0	0	0	0	0	0	0	0	0	0
Mollusca	Gastropoda	Mangeliidae	0	0	0	0	0	0	0	1	0	0	0	0	0	0	0	0	1	0	0	0	0	0	0	0	0	0	0	0	0	0	0	0	0	0	0	0	0	0	0	0
Mollusca	Gastropoda	Margaritidae	0	0	0	0	0	0	0	0	0	0	0	0	0	1	0	0	1	0	0	0	0	0	0	1	0	0	1	0	0	0	1	1	1	0	0	0	1	0	0	0
Chordata	Actinopterygii	Monacanthidae	0	0	0	0	0	0	1	0	0	0	0	0	0	0	0	0	0	0	0	0	0	0	0	0	0	0	0	0	0	0	0	0	0	0	0	0	0	0	0	0
Mollusca	Polyplacophora	Mopalioidea	0	0	0	0	0	0	0	0	0	0	0	0	0	0	0	0	0	0	0	0	0	0	0	0	0	0	0	0	0	0	0	0	0	0	0	0	1	0	0	0
Arthropoda	Malacostraca	Munididae	0	0	0	0	0	0	0	0	0	0	0	0	0	0	0	1	0	0	0	0	0	0	0	0	0	0	0	0	0	0	0	0	0	0	0	0	0	0	0	0
Arthropoda	Malacostraca	Munidopsidae	0	1	1	1	0	0	1	0	1	0	0	1	1	1	0	1	1	1	0	1	1	0	1	1	1	0	1	1	0	0	1	1	1	1	1	1	1	1	1	0
Mollusca	Bivalvia	Mytilidae	0	1	1	1	0	1	0	1	1	1	1	1	1	1	0	1	1	1	0	0	1	0	0	1	1	1	1	1	1	1	1	1	1	1	1	1	1	0	1	1
Chordata	Myxini	Myxinidae	0	0	0	0	0	0	0	0	0	0	0	0	0	0	0	0	0	0	0	0	0	0	0	1	0	0	0	0	0	0	0	0	0	0	0	0	0	0	0	0
Mollusca	Gastropoda	Naticidae	0	0	0	0	0	0	0	0	0	0	0	0	0	0	0	0	0	0	0	0	1	0	0	0	0	0	0	0	0	0	0	0	0	0	0	0	0	0	0	0
Annelida	Polychaeta	Nautiliniellidae	0	0	0	0	0	0	0	0	0	0	0	0	0	0	1	0	0	0	0	0	0	0	0	0	0	0	0	0	0	0	0	0	0	0	0	0	0	0	0	0
Arthropoda	Malacostraca	Nebaliidae	0	0	0	0	0	0	0	0	0	0	0	0	0	0	0	0	0	0	0	0	0	0	0	0	0	0	0	0	0	1	0	0	0	0	0	0	0	0	0	0
Arthropoda	Malacostraca	Nematocarcinidae	0	0	0	0	0	0	0	0	0	0	0	0	0	0	0	0	0	0	0	1	0	0	0	0	0	0	0	0	0	1	0	0	0	0	0	0	0	0	0	0
Mollusca	Gastropoda	Neomphalidae	0	1	0	0	0	0	0	0	0	0	0	0	0	0	0	0	0	0	0	0	0	0	0	0	0	0	0	0	0	0	0	0	0	0	0	0	0	0	0	0
Arthropoda	Hexanauplia	Neoverrucidae	0	0	0	1	0	0	0	1	1	1	1	0	0	0	0	1	1	0	0	1	1	0	1	1	0	0	1	1	1	1	1	1	0	1	1	1	1	0	1	0
Annelida	Polychaeta	Nereididae	0	0	0	0	0	0	0	0	0	0	0	0	0	0	0	0	0	0	0	0	0	0	0	0	0	0	0	0	1	0	0	0	0	0	0	1	0	0	1	0
Echinodermata	Ophiuroidea	Ophiacanthida incertae sedis	0	0	0	0	0	0	0	0	0	0	0	0	0	0	0	0	0	0	0	0	0	0	0	0	0	0	0	0	0	0	0	0	0	0	0	0	0	0	0	0
Arthropoda	Malacostraca	Paguridae	0	0	0	0	0	0	0	0	0	0	0	0	0	0	0	1	0	0	0	0	0	0	0	0	0	0	0	0	0	0	0	0	0	0	0	0	0	0	0	0
Arthropoda	Malacostraca	Palaemonidae	0	0	0	0	0	0	0	1	0	0	0	0	0	0	0	1	0	0	0	0	0	0	0	0	0	0	0	0	0	1	0	0	0	0	0	0	0	0	0	0
Arthropoda	Malacostraca	Pandalidae	0	0	0	0	0	0	0	0	0	0	0	0	0	0	0	1	0	0	0	0	0	0	0	0	0	0	0	0	0	0	0	0	0	0	0	0	0	0	0	0
Arthropoda	Malacostraca	Parapaguridae	0	0	0	0	0	0	0	0	0	0	0	0	0	0	0	1	0	0	0	0	0	0	0	0	0	0	0	0	0	0	0	0	0	0	0	0	0	0	0	0
Mollusca	Bivalvia	Pectinidae	0	0	0	0	0	0	0	0	0	0	0	0	0	0	0	0	0	0	0	0	0	0	0	1	0	0	0	1	0	1	0	0	0	0	0	0	0	0	0	0
Mollusca	Gastropoda	Pectinodontidae	0	0	0	0	0	0	0	0	0	0	0	0	0	1	0	0	1	0	0	0	1	0	0	1	0	0	1	0	0	1	1	1	1	0	1	0	1	0	0	0
Mollusca	Gastropoda	Peltospiridae	0	0	0	0	0	0	0	0	0	0	0	0	0	1	0	0	0	0	0	0	0	0	0	0	0	0	0	0	0	0	0	0	0	0	0	0	0	0	0	0
Mollusca	Gastropoda	Phenacolepadidae	0	1	0	1	0	0	0	0	1	1	1	0	0	0	0	0	0	0	0	0	0	0	1	0	0	0	1	1	1	1	1	0	0	1	0	0	0	0	0	0
Arthropoda	Malacostraca	Polychelidae	0	0	0	0	0	0	0	0	0	0	0	0	0	0	0	1	0	0	0	0	0	0	0	0	0	0	0	0	0	0	0	0	0	0	0	0	0	0	0	0
Arthropoda	Ostracoda	Polycopinae	0	0	0	0	0	0	0	0	0	0	0	0	0	0	0	0	0	0	0	0	0	0	0	0	0	0	0	0	0	0	0	0	0	1	0	0	0	0	0	0
Annelida	Polychaeta	Polynoidea	0	1	1	1	0	1	1	1	1	0	0	1	0	0	0	1	1	0	0	1	1	0	1	1	0	0	1	0	1	1	1	1	1	1	0	0	1	0	1	0
Arthropoda	Ostracoda	Pontocyprididae	0	0	0	0	0	0	0	0	0	0	0	0	0	0	0	0	0	0	0	0	0	0	0	0	0	0	0	0	0	0	0	0	0	1	0	0	0	0	0	0
Arthropoda	Malacostraca	Progeryonidae	0	0	0	0	0	0	0	0	0	0	0	0	0	0	0	1	0	0	0	0	0	0	0	0	0	0	0	0	0	0	0	0	0	0	0	0	0	0	0	0
Mollusca	Bivalvia	Propeamussiidae	0	0	0	0	0	1	0	0	0	0	0	0	0	0	0	0	0	0	0	0	0	0	0	0	0	0	0	0	0	0	0	0	0	0	0	0	0	0	0	0
Annelida	Polychaeta	Protodrilidae	0	0	0	1	0	0	0	0	1	0	0	0	0	0	0	0	0	0	0	0	0	0	0	0	0	0	0	0	0	0	0	0	0	0	0	0	0	0	0	0
Mollusca	Gastropoda	Provannidae	0	1	0	1	1	0	1	1	1	1	1	0	0	1	0	1	1	1	1	1	1	1	1	1	0	0	1	0	0	1	1	1	1	1	1	1	1	0	1	0
Arthropoda	Chelicerata	Pycnogonidae	0	0	0	0	0	0	0	0	0	0	0	0	0	0	0	0	0	0	0	0	0	0	0	0	0	0	0	0	0	0	1	0	0	0	0	0	0	0	0	0
Mollusca	Gastropoda	Pyramidellidae	0	0	0	0	0	0	0	0	0	0	0	0	0	0	0	0	1	0	0	0	0	0	0	0	0	0	0	0	0	0	0	0	0	0	0	0	0	0	0	0
Mollusca	Gastropoda	Pyropeltidae	0	0	0	0	0	0	0	0	0	0	0	0	0	0	0	0	0	0	0	0	1	0	0	0	0	0	0	0	0	0	0	0	0	0	0	0	0	0	0	0
Mollusca	Gastropoda	Raphitomidae	0	0	0	0	0	0	0	0	0	1	1	0	0	0	0	0	0	0	0	0	0	0	1	0	0	0	0	0	0	0	0	0	0	0	0	0	1	0	0	0
Cnidaria	Hydrozoa	Rhopalonematidae	0	0	0	0	0	0	0	0	0	0	0	0	0	0	0	0	0	0	0	0	0	0	0	0	0	0	0	0	0	1	0	0	0	0	0	0	0	0	0	0
Mollusca	Gastropoda	Ringiculidae	0	0	0	0	0	0	0	0	0	0	0	0	0	0	0	0	0	0	0	0	0	0	0	0	0	0	0	0	0	1	0	0	0	0	0	0	0	0	0	0
Mollusca	Gastropoda	Rissoidae	0	0	0	0	0	0	0	0	0	0	0	0	0	0	0	0	0	0	0	0	0	0	0	0	0	0	0	0	0	1	0	0	0	0	0	0	0	0	0	0
Annelida	Polychaeta	Sabellidae	0	0	0	0	0	0	0	0	0	0	0	0	0	0	0	0	1	0	0	0	0	0	0	0	0	0	0	0	0	0	0	0	0	0	0	0	0	0	0	0
Arthropoda	Hexanauplia	Scalpellidae	0	0	0	0	0	0	0	1	0	0	0	0	0	0	0	0	0	0	0	0	0	0	0	0	0	0	0	0	0	0	0	0	0	0	0	0	0	0	0	0
Mollusca	Gastropoda	Scissurellidae	0	0	0	0	0	0	0	0	0	0	0	0	0	0	0	0	0	0	0	0	1	0	0	0	0	0	0	0	0	0	0	0	0	0	0	0	0	0	0	0
Annelida	Polychaeta	Siboglinidae	0	0	0	1	1	0	0	1	1	0	1	0	0	1	0	1	1	0	0	1	1	0	0	1	0	0	1	0	0	1	1	1	0	0	0	0	1	0	0	0
Sipuncula	Sipunculidea	Sipunculidae	0	0	0	0	0	0	0	0	0	0	0	0	0	0	0	0	0	0	0	0	0	0	0	0	0	0	0	1	1	0	1	1	0	1	0	1	0	0	1	0
Mollusca	Gastropoda	Skeneidae	0	0	0	1	0	0	0	0	1	0	0	0	0	1	0	0	1	0	0	0	0	0	0	0	0	0	1	0	0	0	1	1	0	0	0	0	1	0	0	0
Mollusca	Bivalvia	Solemyidae	0	1	0	0	0	0	0	0	0	0	0	0	0	0	0	0	1	0	0	0	0	0	0	1	0	0	0	0	0	0	0	0	0	0	0	0	1	0	0	0
Annelida	Polychaeta	Spionidae	0	0	0	0	0	0	0	0	0	0	0	0	0	0	0	0	0	0	0	0	0	0	1	0	0	0	0	0	1	0	0	0	0	0	0	0	0	0	0	0
Chordata	Actinopterygii	Synaphobranchidae	0	0	0	0	0	0	0	0	0	0	0	0	0	0	0	0	0	0	0	0	0	0	0	1	0	0	0	0	0	0	0	0	0	1	0	0	0	0	0	0
Mollusca	Bivalvia	Tellinidae	0	0	0	0	0	0	0	0	0	0	0	0	0	0	0	0	0	0	0	0	0	0	0	1	0	0	0	0	0	0	0	0	0	0	0	0	0	0	0	0
Annelida	Polychaeta	Terebellidae	0	0	0	0	0	0	0	0	0	0	0	0	0	0	0	0	0	0	0	0	0	0	0	0	0	0	1	0	0	0	0	0	0	0	0	1	0	0	0	0
Arthropoda	Malacostraca	Thoridae	0	1	0	0	0	0	0	0	0	0	0	0	0	0	0	0	1	0	0	0	1	0	0	0	0	0	1	0	0	1	1	1	0	0	0	0	1	0	0	0
Mollusca	Bivalvia	Thyasiridae	0	0	0	0	0	0	0	0	0	0	0	0	0	0	0	0	0	0	0	0	0	0	0	1	0	0	0	0	0	0	0	0	0	0	0	0	0	0	0	0
Mollusca	Gastropoda	Trochidae	0	0	0	0	0	0	0	0	0	0	0	0	0	0	0	0	0	0	0	0	0	0	0	0	0	0	0	0	0	0	0	0	0	0	0	0	1	0	0	0
Cnidaria	Hydrozoa	Tubulariidae	0	0	0	0	0	0	0	0	0	0	0	0	0	0	0	0	0	0	0	0	0	0	0	0	0	0	0	0	0	1	0	0	0	0	0	0	0	0	0	0
Mollusca	Gastropoda	Turridae	0	0	0	0	0	0	0	0	0	0	0	0	0	0	0	0	0	0	0	0	1	0	0	0	0	0	0	0	0	0	1	0	0	0	0	0	0	0	0	0
Arthropoda	Hexanauplia	Verrucidae	0	0	0	0	0	0	0	0	0	0	0	0	0	0	0	0	0	0	0	0	0	0	1	0	0	0	0	0	0	0	0	0	0	0	0	0	0	0	0	0
Mollusca	Bivalvia	Vesicomyidae	1	0	0	1	0	0	0	1	1	0	0	0	1	0	1	0	1	0	0	0	1	0	0	1	0	0	0	0	0	1	1	0	0	0	0	0	1	0	0	0
Arthropoda	Malacostraca	Xanthidae	0	0	0	0	0	0	0	1	0	0	0	0	0	0	0	1	0	0	0	0	0	0	0	0	0	0	1	0	0	1	0	0	0	0	0	0	0	0	0	0
Mollusca	Bivalvia	Yoldiidae	0	0	0	0	0	0	0	0	0	0	0	0	0	0	0	0	0	0	0	0	0	0	0	0	0	0	0	0	0	0	0	1	0	0	0	0	0	0	0	0
Chordata	Actinopterygii	Zoarcidae	0	1	0	0	0	0	0	0	0	0	0	0	0	0	0	0	1	0	0	0	1	0	0	1	0	0	0	0	0	1	1	0	0	0	0	0	1	0	0	0

## Sheet: Southwest Pacific
Phylum	Class	Family	KAH0011	TAN0107	TAN0205	FR 08/01	YK04-09	TUIM05MV	TN234	TN235	KM1008	TAN1007	YK13-11	RR1211	TAN1206	TAN1213	FK160320	FK160407
Chordata	Actinopterygii	Cynoglossidae	0	0	0	0	0	0	0	0	0	0	1	0	0	0	0	0
Cnidaria	Anthozoa	Acanthogorgiidae	0	0	0	0	0	0	0	0	0	0	0	0	1	0	0	0
Cnidaria	Anthozoa	Alcyoniidae	0	1	0	0	0	0	0	0	0	0	0	0	1	0	0	0
Annelida	Polychaeta	Alvinellidae	0	0	0	0	0	1	0	1	0	0	0	0	0	0	0	0
Arthropoda	Malacostraca	Alvinocarididae	0	1	1	0	1	1	1	1	0	1	0	1	1	1	1	0
Annelida	Polychaeta	Ampharetidae	0	0	0	0	0	0	0	0	0	0	0	1	0	0	0	0
Annelida	Polychaeta	Amphinomidae	0	0	0	0	0	0	1	0	0	0	0	0	0	0	0	0
Echinodermata	Asteroidea	Asteriidae	0	0	0	0	0	0	0	0	0	0	0	0	0	1	0	0
Mollusca	Gastropoda	Buccinidae	0	0	0	0	1	0	1	1	0	0	0	0	0	0	0	0
Arthropoda	Malacostraca	Bythograeidae	0	0	0	0	1	1	1	1	0	0	0	1	0	1	0	0
Mollusca	Gastropoda	Calliostomatidae	0	0	0	0	0	0	0	0	0	0	0	0	1	0	0	0
Cnidaria	Anthozoa	Caryophylliidae	0	0	0	0	0	0	0	0	0	0	0	0	1	0	0	0
Arthropoda	Hexanauplia	Chionelasmatidae	0	0	0	0	1	0	0	0	0	0	0	1	0	0	0	0
Cnidaria	Anthozoa	Chrysogorgiidae	0	0	0	0	0	0	0	0	0	0	0	0	1	0	0	0
Porifera	Demospongiae	Cladorhizidae	0	0	0	0	0	0	0	0	0	1	0	0	0	0	0	0
Mollusca	Gastropoda	Conidae	0	0	0	0	1	0	0	0	0	0	0	0	0	0	0	0
Cnidaria	Anthozoa	Coralliidae	0	0	0	0	0	0	0	0	0	0	0	0	1	0	0	0
Cnidaria	Anthozoa	Dendrophylliidae	0	0	0	0	0	0	0	0	0	0	0	0	1	0	0	0
Echinodermata	Echinoidea	Echinidae	0	0	0	0	0	0	0	0	0	0	0	0	1	0	0	0
Arthropoda	Haxanauplia	Eolapadidae	0	0	1	0	0	0	0	0	0	0	0	0	0	0	0	0
Cnidaria	Anthozoa	Epizoanthidae	0	0	0	0	0	0	0	0	0	0	0	0	1	0	0	0
Annelida	Polychaeta	Eunicidae	0	0	0	0	0	0	0	0	0	0	0	1	0	0	0	0
Porifera	Hexactinellida	Euplectellidae	0	0	0	0	0	0	0	0	0	0	0	0	1	0	0	0
Porifera	Hexactinellida	Farreidae	0	0	0	0	0	0	0	0	0	0	0	0	1	0	0	0
Arthropoda	Malacostraca	Galatheidae	0	1	1	0	0	0	0	1	0	0	0	0	0	0	0	0
Echinodermata	Ophiuroidea	Gorgonocephalidae	0	0	0	0	0	0	0	0	0	0	0	0	1	0	0	0
Echinodermata	Ophiuroidea	Hemieuryalidae	0	0	0	0	0	0	0	0	0	0	0	0	1	0	0	0
Annelida	Polychaeta	Iphionidae	1	0	0	0	0	0	0	0	0	0	0	0	0	0	0	0
Cnidaria	Anthozoa	Isididae	0	0	0	0	0	0	0	0	0	0	0	0	1	0	0	0
Echinodermata	Crinoidea	Isocrinidae	0	0	0	0	0	0	0	0	0	0	0	0	1	0	0	0
Mollusca	Gastropoda	Lepetodrilidae	0	0	0	0	1	0	0	0	0	0	0	1	0	0	0	0
Arthropoda	Malacostraca	Lithodidae	0	0	1	0	1	0	0	0	0	1	0	1	0	0	1	0
Arthropoda	Malacostraca	Munidopsidae	0	0	0	0	1	1	1	0	0	1	0	1	0	0	0	0
Mollusca	Bivalvia	Mytilidae	1	1	1	0	1	1	1	1	0	0	1	1	1	1	0	1
Echinodermata	Ophiuroidea	Ophiacanthidae	0	0	0	0	0	0	0	0	0	0	0	0	1	0	0	0
Chordata	Actinopterygii	Ophidiidae	0	0	0	0	1	0	0	0	0	0	0	0	0	0	0	0
Arthropoda	Malacostraca	Oplophoridae	0	0	0	0	0	0	0	0	0	0	0	0	1	0	0	0
Arthropoda	Malacostraca	Paguridae	0	0	0	0	0	0	0	0	0	1	0	0	0	0	0	0
Mollusca	Gastropoda	Phenacolepadidae	0	0	0	0	1	0	0	0	0	0	0	1	0	0	0	0
Mollusca	Gastropoda	Pleurobranchaeidae	0	0	0	0	0	0	0	0	0	0	0	0	1	0	0	0
Annelida	Polychaeta	Polynoidea	1	0	0	0	1	1	1	1	0	0	0	1	0	1	0	0
Mollusca	Gastropoda	Provannidae	0	0	0	1	1	1	0	1	0	0	0	1	0	0	1	1
Arthropoda	Malacostraca	Pylochelidae	0	0	0	0	0	0	0	0	0	1	0	0	0	0	0	0
Mollusca	Gastropoda	Raphitomidae	0	0	1	0	0	0	0	0	1	0	0	1	0	0	0	0
Porifera	Hexactinellida	Rossellidae	0	0	0	0	0	0	0	0	0	0	0	0	1	0	0	0
Arthropoda	Hexanauplia	Scalpellidae	0	0	0	0	1	0	1	0	0	1	0	1	1	0	0	0
Annelida	Polychaeta	Siboglinidae	0	0	0	0	1	0	0	0	0	0	0	1	0	0	0	0
Mollusca	Bivalvia	Solemyidae	0	0	0	0	1	0	0	0	0	0	0	0	0	0	0	0
Cnidaria	Hydrozoa	Stylasteridae	0	0	0	0	0	0	0	0	0	0	0	0	1	0	0	0
Chordata	Actinopterygii	Synaphobranchidae	0	0	0	0	0	0	1	0	0	0	0	0	0	0	0	0
Annelida	Polychaeta	Terebellidae	0	0	0	0	0	0	0	0	0	0	0	0	1	0	0	0
Arthropoda	Malacostraca	Thoridae	0	0	0	0	1	0	0	1	0	0	0	0	0	0	0	0
Mollusca	Bivalvia	Vesicomyidae	0	0	0	0	0	1	0	0	0	0	0	0	0	0	0	0
Chordata	Actinopterygii	Zoarcidae	0	0	0	0	0	0	1	0	0	0	0	0	0	0	0	0
